# Supplementary material for: Acute sensitivity of white sturgeon (Acipenser transmontanus) and rainbow trout (Oncorhynchus mykiss) to copper, cadmium, or zinc in water-only laboratory exposures
Source: PubMed Central journal article supplement — Environ Toxicol Chem. 2014 Sep 5;33(10):2259–72. doi: 10.1002/etc.2684 (PMC4278710; doi:10.1002/etc.2684), 2014-09-05
Supplement: etc0033-2259-sd1.pdf [file etc0033-2259-sd1.pdf]

# Supplementary Data, Figure S1

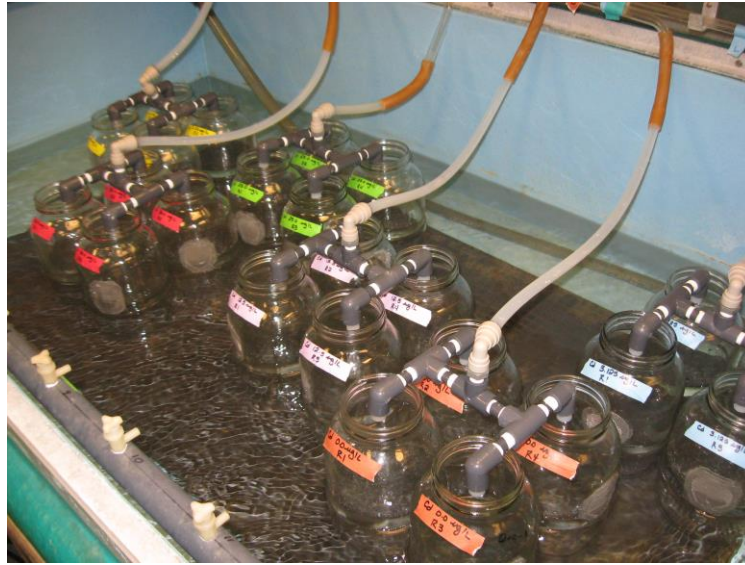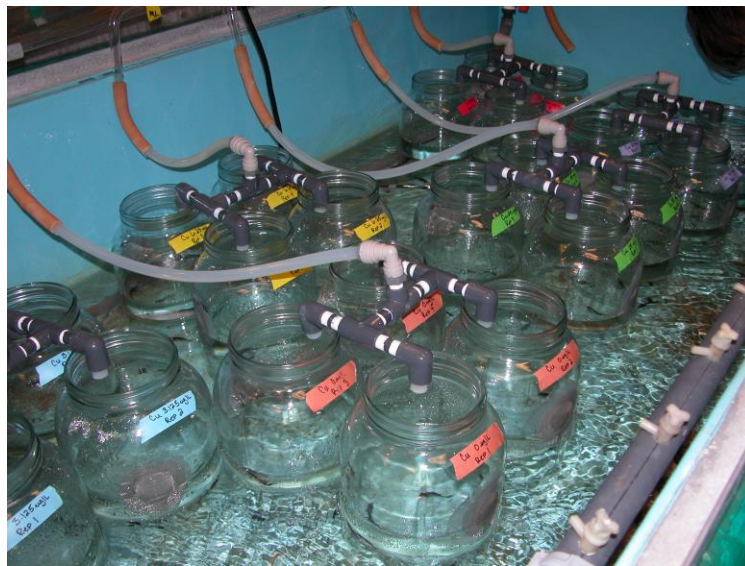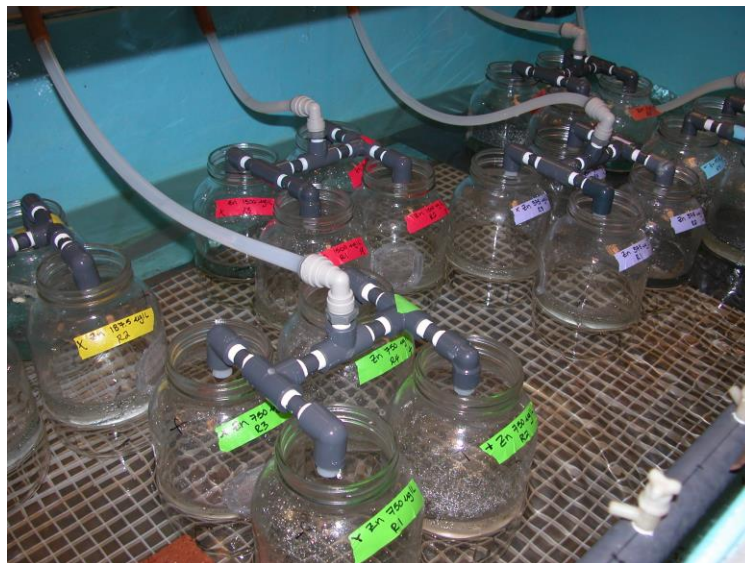

Supplemental Data, Figure Legend

Figure S1. Small diluter exposure systems setup with in-line four-way splitter.
